# Supplementary material for: Menopausal Status Combined with Serum CA125 Level Significantly Predicted Concurrent Endometrial Cancer in Women Diagnosed with Atypical Endometrial Hyperplasia before Surgery †
Source: MDPI journal article supplement (doi:10.3390/diagnostics12010006), 2021-12-21
Supplement: s1 [file s1]

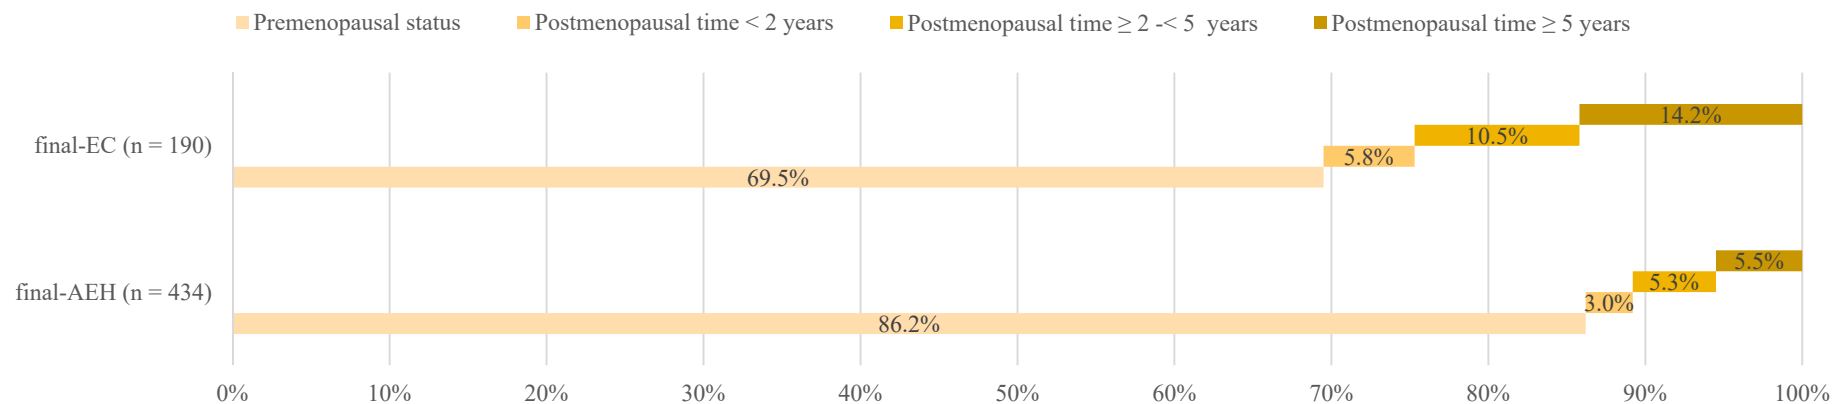

**Figure S1.** The distribution of final-EC and final-AEH patients diagnosed postoperatively in 4 subgroups according to menopause years (premenopausal status, postmenopausal time < 2 years, ≥ 2 -< 5 years and ≥ 5 years). Notes: Subgroups of menopause time were divided as: premenopausal status, postmenopausal time < 2 years, ≥ 2 -< 5 years and ≥ 5 years. Abbreviations: final-AEH: atypical endometrial hyperplasia diagnosed by final histopathology; final-EC: endometrial cancer diagnosed by final histopathology; CA125, cancer antigen 125.
