# Supplementary material for: Menopausal Status Combined with Serum CA125 Level Significantly Predicted Concurrent Endometrial Cancer in Women Diagnosed with Atypical Endometrial Hyperplasia before Surgery †
Source: MDPI journal article supplement (doi:10.3390/diagnostics12010006), 2021-12-21
Supplement: s1 [file s1]

**Table S1.** Postoperative pathological characteristics and lymph node metastasis of final-EC patients.

| Characteristic                 | Patients ( <i>n</i> ) | final-EC ( <i>n</i> = 190) |
|--------------------------------|-----------------------|----------------------------|
| <b>FIGO stage (2009)</b>       | 190                   |                            |
| <b>IA</b>                      |                       | 170 (89.5%)                |
| <b>IB</b>                      |                       | 7 (3.7%)                   |
| <b>II</b>                      |                       | 6 (3.2%)                   |
| <b>IIIA</b>                    |                       | 3 (1.6%)                   |
| <b>IIIC1</b>                   |                       | 1 (0.5%)                   |
| <b>IIIC2</b>                   |                       | 3 (1.6%)                   |
| <b>Grade</b>                   | 183                   |                            |
| <b>1</b>                       |                       | 172 (94.0%)                |
| <b>2</b>                       |                       | 9 (4.9%)                   |
| <b>3</b>                       |                       | 2 (1.1%)                   |
| <b>Myometrial invasion</b>     | 190                   |                            |
| <b>No invasion</b>             |                       | 48 (25.3%)                 |
| <b>&lt; 50% invasion</b>       |                       | 131 (68.9%)                |
| <b>≥ 50% invasion</b>          |                       | 11 (5.8%)                  |
| <b>Histology</b>               | 190                   |                            |
| <b>Endometrioid</b>            |                       | 184 (96.8%)                |
| <b>Serous</b>                  |                       | 1 (0.5%)                   |
| <b>Mucinous</b>                |                       | 1 (0.5%)                   |
| <b>Secretory</b>               |                       | 4 (2.1%)                   |
| <b>LVSI</b>                    | 190                   |                            |
| <b>Absent</b>                  |                       | 180 (94.7%)                |
| <b>Present</b>                 |                       | 10 (5.3%)                  |
| <b>Peritoneal washes</b>       | 71                    |                            |
| <b>(-)</b>                     |                       | 68 (95.8%)                 |
| <b>(+)</b>                     |                       | 3 (4.2%)                   |
| <b>Cervical infiltration</b>   | 190                   |                            |
| <b>(-)</b>                     |                       | 183 (96.3%)                |
| <b>(+)</b>                     |                       | 7 (3.7%)                   |
| <b>Parametrium involvement</b> | 190                   |                            |
| <b>(-)</b>                     |                       | 190 (100%)                 |
| <b>(+)</b>                     |                       | 0 (0%)                     |
| <b>MELF</b>                    | 190                   |                            |
| <b>(-)</b>                     |                       | 182 (95.8%)                |
| <b>(+)</b>                     |                       | 8 (4.2%)                   |
| <b>Para-aortic lymph node</b>  | 16                    |                            |
| <b>(-)</b>                     |                       | 13 (81.2%)                 |
| <b>(+)</b>                     |                       | 3 (18.8%)                  |
| <b>Pelvic lymph node</b>       | 37                    |                            |
| <b>(-)</b>                     |                       | 34 (91.9%)                 |
| <b>(+)</b>                     |                       | 3 (8.1%)                   |

Data shown were number (%).

Abbreviations: final-EC, endometrial cancer diagnosed by final histopathology; LVSI, lymph-vascular space invasion; MELF, microcystic, elongated and fragmented.
