# Supplementary material for: Menopausal Status Combined with Serum CA125 Level Significantly Predicted Concurrent Endometrial Cancer in Women Diagnosed with Atypical Endometrial Hyperplasia before Surgery †
Source: MDPI journal article supplement (doi:10.3390/diagnostics12010006), 2021-12-21
Supplement: s1 [file s1]

**Table S3.** The positive and negative predictive values of the combination of “postmenopausal status + CA125  $\geq$  35 U/ml” for concurrent EC in final histopathology of 447 preoperative-AEH patients <sup>a</sup> with available serum CA125 value.

|                                             | Total preoperative-AEH<br>patients ( <i>n</i> ) | Final histopathology  |                        | Positive predictive value<br>(%) | Negative predictive value<br>(%) |
|---------------------------------------------|-------------------------------------------------|-----------------------|------------------------|----------------------------------|----------------------------------|
|                                             |                                                 | final-EC ( <i>n</i> ) | final-AEH ( <i>n</i> ) |                                  |                                  |
| Postmenopausal status+ CA125 $\geq$ 35 U/ml | 6                                               | 5                     | 1                      | 83.3% (5/6)                      | -                                |
| Others <sup>b</sup>                         | 441                                             | 125                   | 316                    | -                                | 71.7% (316/441)                  |
| Total ( <i>n</i> )                          | 447                                             | 130                   | 317                    | -                                | -                                |

Data shown were number or percentage.

<sup>a</sup> In total of 447 patients who had serum CA125 value with available data.

<sup>b</sup> These patients included the preoperative-AEH patients with “premenopausal status + CA125 < 35 U/ml” and “either postmenopausal status or CA125  $\geq$  35 U/ml”.

Notes: According to menopause status and serum of CA125 level, 447 preoperative-AEH patients were divided into three subgroups: “premenopausal status + CA125 < 35 U/ml” (no risk factor), “either postmenopausal status or CA125  $\geq$  35 U/ml” (either one risk factor) and “postmenopausal status + CA125  $\geq$  35 U/ml” (both risk factors).

Abbreviations: AEH: atypical endometrial hyperplasia; EC: endometrial cancer; final-AEH: atypical endometrial hyperplasia diagnosed by final histopathology; final-EC: endometrial cancer diagnosed by final histopathology; CA125, cancer antigen 125.
