# Supplementary material for: Menopausal Status Combined with Serum CA125 Level Significantly Predicted Concurrent Endometrial Cancer in Women Diagnosed with Atypical Endometrial Hyperplasia before Surgery †
Source: MDPI journal article supplement (doi:10.3390/diagnostics12010006), 2021-12-21
Supplement: s1 [file s1]

**Table S2.** Clinical characteristics of patients diagnosed with low-risk EC and intermediate-high-risk EC by final histopathology.

| Characteristics                       | Number | Total final-EC<br>( <i>n</i> = 190) | low-risk EC<br>( <i>n</i> = 160) | intermediate-high-risk EC<br>( <i>n</i> = 30) | <i>p</i> value <sup>b,c</sup> |
|---------------------------------------|--------|-------------------------------------|----------------------------------|-----------------------------------------------|-------------------------------|
| Median (interquartile range)          |        |                                     |                                  |                                               |                               |
| Age (years)                           | 190    | 49 (44-53)                          | 48.5 (45-53)                     | 51.5 (43-59)                                  | 0.211                         |
| BMI (kg/m <sup>2</sup> ) <sup>a</sup> | 189    | 24.46 (22.34-27.60)                 | 24.56 (22.43-27.89)              | 23.74 (21.55-26.71)                           | 0.159                         |
| Number (%)                            |        |                                     |                                  |                                               |                               |
| BMI (kg/m <sup>2</sup> ) <sup>a</sup> | 189    |                                     |                                  |                                               | 0.146                         |
| < 28                                  |        | 148 (78.3%)                         | 121 (76.1%)                      | 27 (90.0%)                                    |                               |
| ≥ 28                                  |        | 41 (21.7%)                          | 38 (23.9%)                       | 3 (10.0%)                                     |                               |
| Menopausal status                     | 190    |                                     |                                  |                                               | 0.097                         |
| Premenopausal                         |        | 132 (69.5%)                         | 115 (71.9%)                      | 17 (56.7%)                                    |                               |
| Postmenopausal                        |        | 58 (30.5%)                          | 45 (28.1%)                       | 13 (43.3%)                                    |                               |
| Fertility                             | 190    |                                     |                                  |                                               | 0.218                         |
| Pluripara                             |        | 179 (94.2%)                         | 149 (93.1%)                      | 30 (100.0%)                                   |                               |
| Nullipara                             |        | 11 (5.8%)                           | 11 (6.9%)                        | 0 (0)                                         |                               |
| Tubal ligation                        | 190    |                                     |                                  |                                               | 0.522                         |
| NO                                    |        | 175 (92.1%)                         | 146 (91.3%)                      | 29 (96.7%)                                    |                               |
| YES                                   |        | 15 (7.9%)                           | 14 (8.8%)                        | 1 (3.3%)                                      |                               |
| Diabetes                              | 190    |                                     |                                  |                                               | 0.724                         |
| NO                                    |        | 177 (93.2%)                         | 150 (93.8%)                      | 27 (90.0%)                                    |                               |
| YES                                   |        | 13 (6.8%)                           | 10 (6.3%)                        | 3 (10.0%)                                     |                               |
| Hypertension                          | 190    |                                     |                                  |                                               | 0.382                         |
| NO                                    |        | 139 (73.2%)                         | 119 (74.4%)                      | 20 (66.7%)                                    |                               |
| YES                                   |        | 51 (26.8%)                          | 41 (25.6%)                       | 10 (33.3%)                                    |                               |
| FBG (mmol/L)                          | 184    |                                     |                                  |                                               | 1.000                         |
| < 7.0                                 |        | 171 (92.9%)                         | 144 (92.9%)                      | 27 (93.1%)                                    |                               |
| ≥ 7.0                                 |        | 13 (7.1%)                           | 11 (7.1%)                        | 2 (6.9%)                                      |                               |
| HOMA-IR <sup>a</sup>                  | 61     |                                     |                                  |                                               | 0.490                         |
| < 2.95                                |        | 45 (73.8%)                          | 39 (76.5%)                       | 6 (60.0%)                                     |                               |
| ≥ 2.95                                |        | 16 (26.2%)                          | 12 (23.5%)                       | 4 (40.0%)                                     |                               |
| CA125 (U/ml) <sup>a</sup>             | 130    |                                     |                                  |                                               | 0.003                         |
| < 35                                  |        | 109 (83.8%)                         | 96 (88.1%)                       | 13 (61.9%)                                    |                               |
| ≥ 35                                  |        | 21 (16.2%)                          | 13 (11.9%)                       | 8 (38.1%)                                     |                               |
| Sampling method                       | 190    |                                     |                                  |                                               | 0.613                         |
| D&C alone                             |        | 134 (70.5%)                         | 114 (71.3%)                      | 20 (66.7%)                                    |                               |
| D&C with HSC                          |        | 56 (29.5%)                          | 46 (28.7%)                       | 10 (33.3%)                                    |                               |

Data shown were median (interquartile range) or number (%).

<sup>a</sup> All variables were analyzed among 190 final-EC patients except for BMI, FBG, HOMA-IR and CA125. Missing data included 1 case for BMI, 6 for FBG, 129 for HOMA-IR and 60 for CA125.

<sup>b</sup> *p* value: difference between low-risk EC group and intermediate-high-risk EC group.

<sup>c</sup> Significant difference *p* < 0.05.

Abbreviations: EC, endometrial cancer; final-EC: endometrial cancer diagnosed by final histopathology; BMI, body

mass index; FBG, fasting blood glucose; HOMA-IR, homeostasis model assessment-insulin resistance; CA125, cancer antigen 125; D&C, dilatation and curettage; HSC, hysteroscopy. Low-risk EC postoperatively was defined as: endometrioid endometrial cancer grade 1-2, myometrial invasion < 50% and no other risk factors presented (which included grade 3, non-endometrioid endometrial cancer, myometrial invasion  $\geq$  50%, cervical stromal involvement, extra-uterine involvement or lymph-vascular space invasion). All other endometrial cancer cases were defined as intermediate-high-risk EC.
